# Supplementary material
Source: bioRxiv or medRxiv preprint supplement (https://www.biorxiv.org/highwire/filestream/53728/field_highwire_adjunct_files/2/178806-11.pdf)
Supplement: Supplementary file [file 178806-11.pdf]

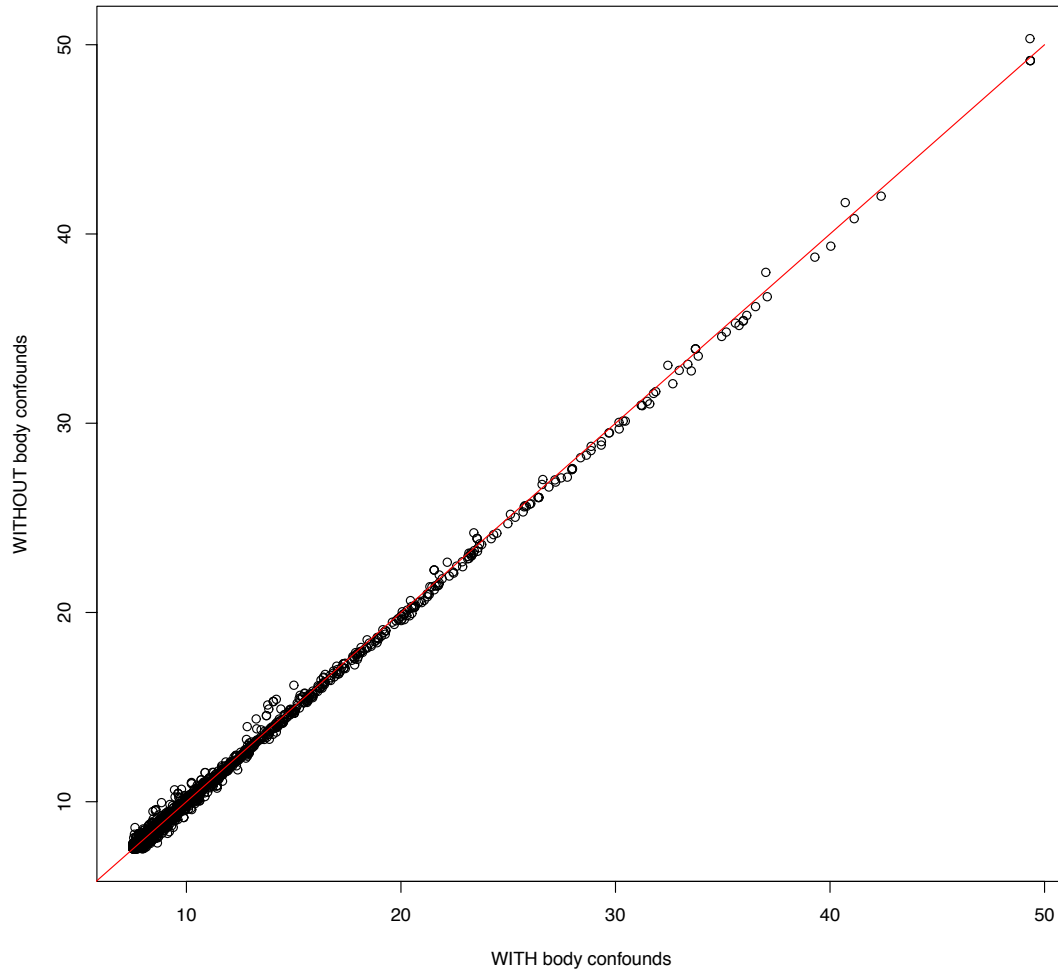

**Supplementary Figure S11. Association of IDPs with and without Body Confounds.** The GWAS for all 3,144 IDPs was run with and without correcting for the 4 body confounds systolic and diastolic blood pressure, height and weight. The top associations across all the GWAS ( $-\log_{10}$  p-value > 7.5) with and without body confound correction are plotted against each other in the figure.
